# Supplementary material for: Independent Evolution of Six Families of Halogenating Enzymes
Source: PubMed Central journal article supplement (PMC4859513; doi:10.1371/journal.pone.0154619), 2016-05-06
Supplement: pone.0154619.s002.pdf [file pone.0154619.s002.pdf]

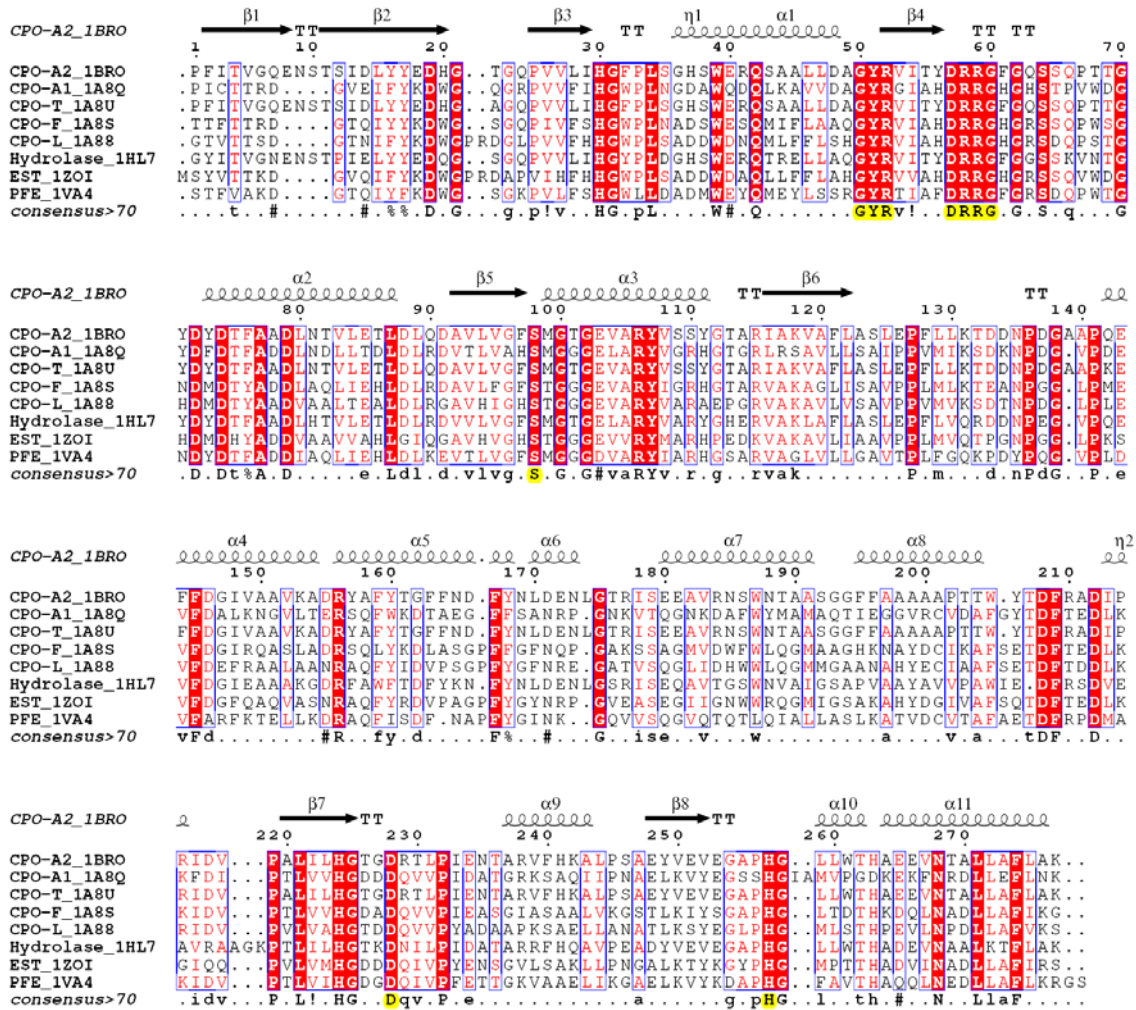

**S2 Fig. Multiple sequence alignment of the cofactor-free HPO and the  $\alpha/\beta$  hydrolases.** The conserved residues include the GYR and DRRG motifs, the catalytic triad (S98-D228-H257), and the residues (HG, D-G-G-S and G-S-G-G) for structure arrangement and stabilization.
