# Supplementary material for: Independent Evolution of Six Families of Halogenating Enzymes
Source: PubMed Central journal article supplement (PMC4859513; doi:10.1371/journal.pone.0154619), 2016-05-06
Supplement: pone.0154619.s004.pdf [file pone.0154619.s004.pdf]

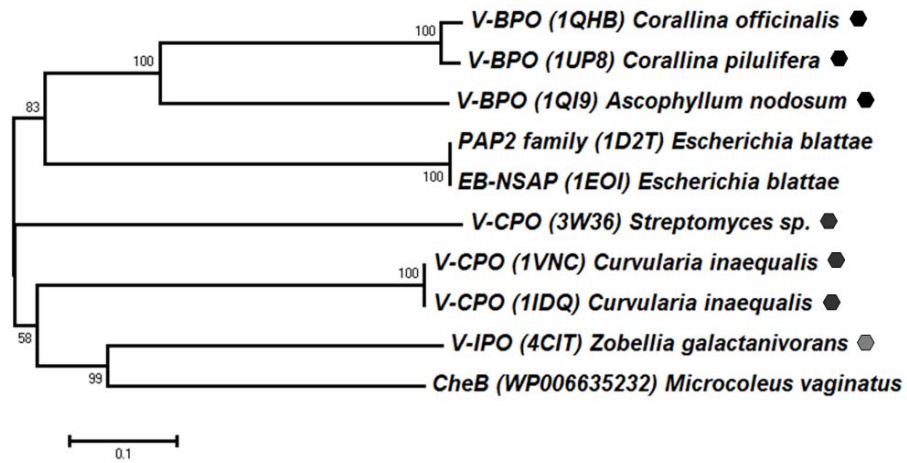

**S4 Fig. Evolutionary relationships between the V-HPO and the acid phosphatases.** The phylogenetic tree was reconstructed using the Neighbor-Joining method. The representative V-HPO enzymes are marked (●).
