# Supplementary material for: Independent Evolution of Six Families of Halogenating Enzymes
Source: PubMed Central journal article supplement (PMC4859513; doi:10.1371/journal.pone.0154619), 2016-05-06
Supplement: pone.0154619.s010.pdf [file pone.0154619.s010.pdf]

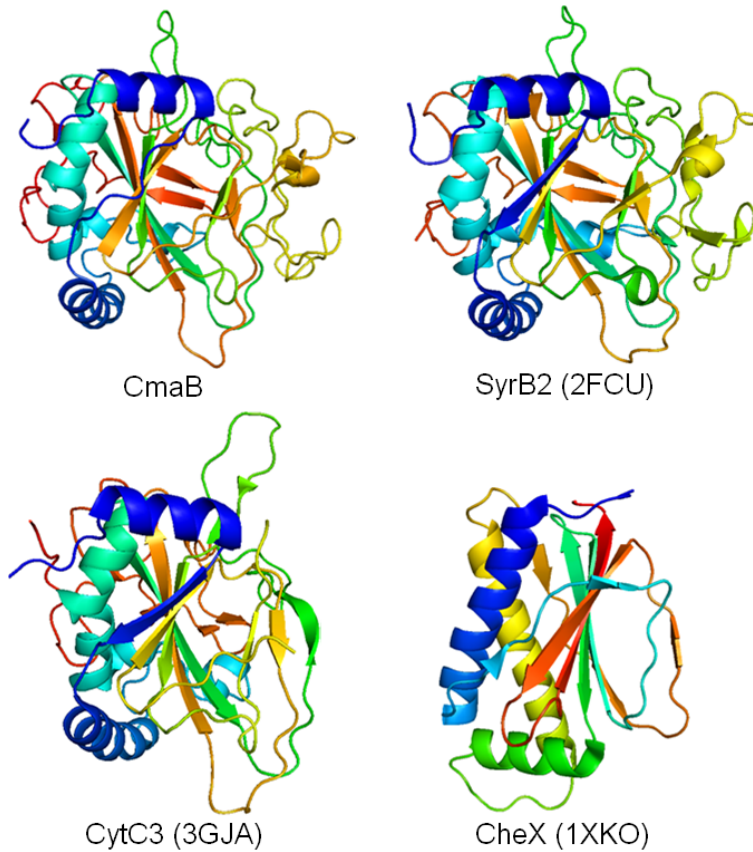

**S10 Fig. Structure comparison of the NI-HG and the chemotaxis phosphatase.** The structure of CmaB (AAO58149) from *Pseudomonas syringae* was predicted based on the crystal structure of SyrB2 (2FCU), using the SWISS-MODEL homology-modeling server.
