# Supplementary material for: Independent Evolution of Six Families of Halogenating Enzymes
Source: PubMed Central journal article supplement (PMC4859513; doi:10.1371/journal.pone.0154619), 2016-05-06
Supplement: pone.0154619.s012.pdf [file pone.0154619.s012.pdf]

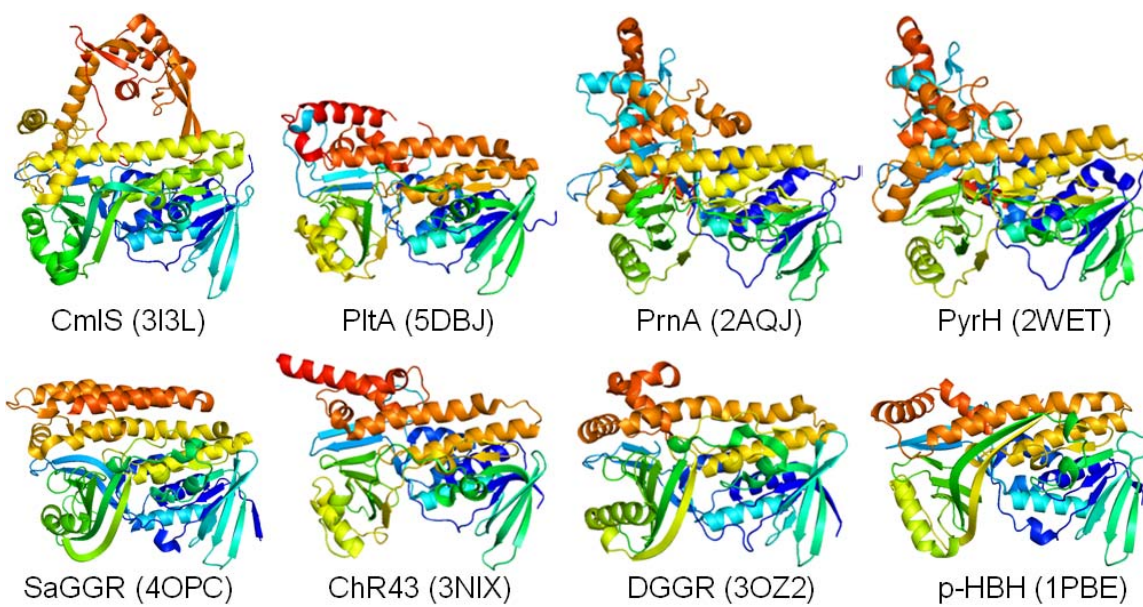

**S12 Fig. Structure comparison of the F-HG and the oxidoreductases.**
