# Supplementary material for: Independent Evolution of Six Families of Halogenating Enzymes
Source: PLOS journal article supplement (doi:10.1371/journal.pone.0154619), 2016-05-06
Supplement: S9 (10.1371/journal.pone.0154619.s009) [file journal.pone.0154619.s009]

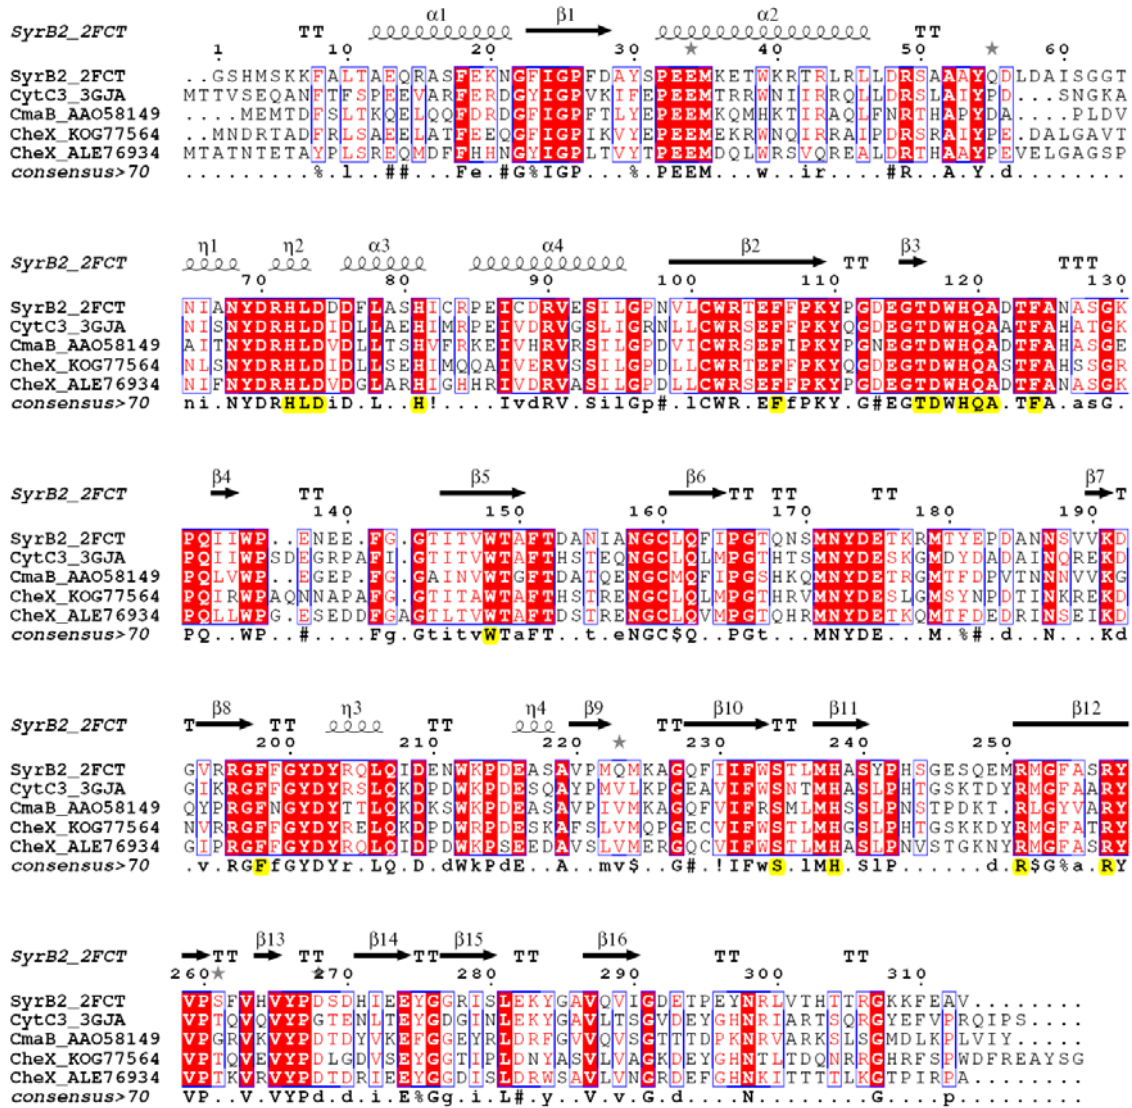

**S9 Fig. Multiple sequence alignment of the NI-HG and the chemotaxis phosphatases.**  
 The conserved motifs (HLD-H and HQA-H) and the active site residues (H, F, R and S) in a hydrophobic pocket are highlighted.
