# Supplementary material for: Independent Evolution of Six Families of Halogenating Enzymes
Source: PLOS journal article supplement (doi:10.1371/journal.pone.0154619), 2016-05-06
Supplement: S14 (10.1371/journal.pone.0154619.s014) [file journal.pone.0154619.s014]

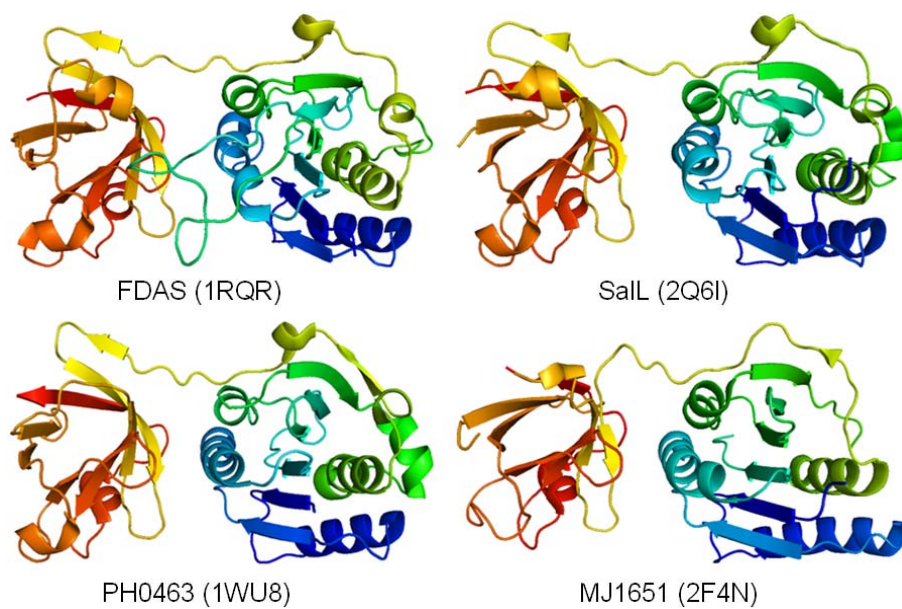

**S14 Fig. Structure comparison of the S-HG and the SAM hydroxide adenosyltransferases.**
